# Supplementary material for: Comparison of Physiological Effects Induced by Two Compression Stockings and Regular Socks During Prolonged Standing Work
Source: PubMed Central journal article supplement — Hum Factors. 2021 Jun 2;65(4):562–74. doi: 10.1177/00187208211022126 (PMC10210207; doi:10.1177/00187208211022126), 2021-06-02
Supplement: sj-pdf-1-hfs-10.1177_00187208211022126.pdf [file sj-pdf-1-hfs-10.1177_00187208211022126.pdf]

## Supplemental Material

Raw data mean and (standard deviation) of relevant outcome variables

| Measurement                        | Control Group<br>n = 19 | Intervention Groups<br>n = 17 |                             |
|------------------------------------|-------------------------|-------------------------------|-----------------------------|
|                                    |                         | I <sub>15-20</sub><br>n = 9   | I <sub>20-30</sub><br>n = 8 |
| Height (cm)                        | 165.83 (6.43)           | 165.07 (5.72)                 | 166.57 (7.32)               |
| Weight (kg)                        | 76.01 (10.59)           | 76.88 (12.88)                 | 73.50 (8.93)                |
| Age (years)                        | 34.71 (10.37)           | 39.33 (7.77)                  | 32.57 (6.75)                |
| MTF (N): Baseline                  | 2.01 (0.73)             | 1.94 (0.94)                   | 2.12 (0.78)                 |
| MTF (N): 6 hours                   | 2.00 (0.855)            |                               |                             |
| MTF (N): 12 hours                  | 1.54 (0.62)             | 1.94 (0.82)                   | 2.05 (0.78)                 |
| VOL (grams): Baseline              | 3142.37 (339.05)        | 3163.5 (431.34)               | 3198.75 (351.88)            |
| VOL (grams): 6 hours               | 3189.2 (318.99)         |                               |                             |
| VOL (grams): 12 hours              | 3183.73 (326.67)        | 3167.75(428.45)               | 3228.12 (357.45)            |
| Discomfort feet: Baseline          | 3.22 (2.57)             | 2.04 (1.34)                   | 1.9 (1.65)                  |
| Discomfort feet: 6 hours           | 3.02 (2.16)             |                               |                             |
| Discomfort feet: 12 hours          | 4.33 (2.78)             | 2.64 (2.31)                   | 2.08 (1.80)                 |
| Discomfort knees: Baseline         | 2.16 (1.75)             | 2.28 (1.39)                   | 1.41 (0.42)                 |
| Discomfort knees: 6 hours          | 2.70 (2.01)             |                               |                             |
| Discomfort knees: 12 hours         | 3.29 (2.18)             | 2.58 (2.21)                   | 1.56 (0.48)                 |
| Discomfort lower-legs:<br>Baseline | 2.6 (2.22)              | 1.99 (1.36)                   | 1.42 (0.48)                 |
| Discomfort lower-legs: 6 hours     | 3.26 (2.03)             |                               |                             |
| Discomfort lower-legs: 12<br>hours | 4.18 (2.50)             | 2.16 (1.91)                   | 1.55 (0.51)                 |
